# Supplementary material for: Electrical rectification from a fullerene[60]-dyad based metal–organic–metal junction
Source: Royal Society of Chemistry journal article supplement (doi:10.1039/b602203k), 2006-01-01
Supplement: b602203k.pdf [file b602203k.pdf]

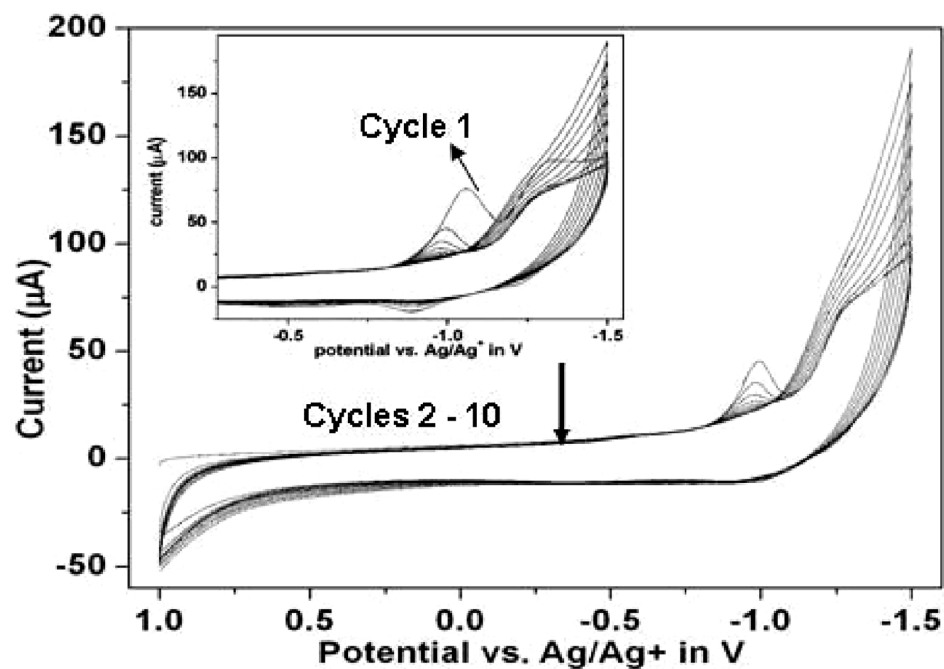

**Fig. S1.** Cyclic voltammogram of the dyad monolayer film deposited onto ITO electrode at  $10 \text{ mN m}^{-1}$  in acetonitrile solvent. Supporting electrolyte:  $\text{TBAPF}_6$ ; counter electrode: Pt; reference electrode:  $\text{Ag}/\text{Ag}^+$ ; scan rate:  $500 \text{ mV s}^{-1}$ .

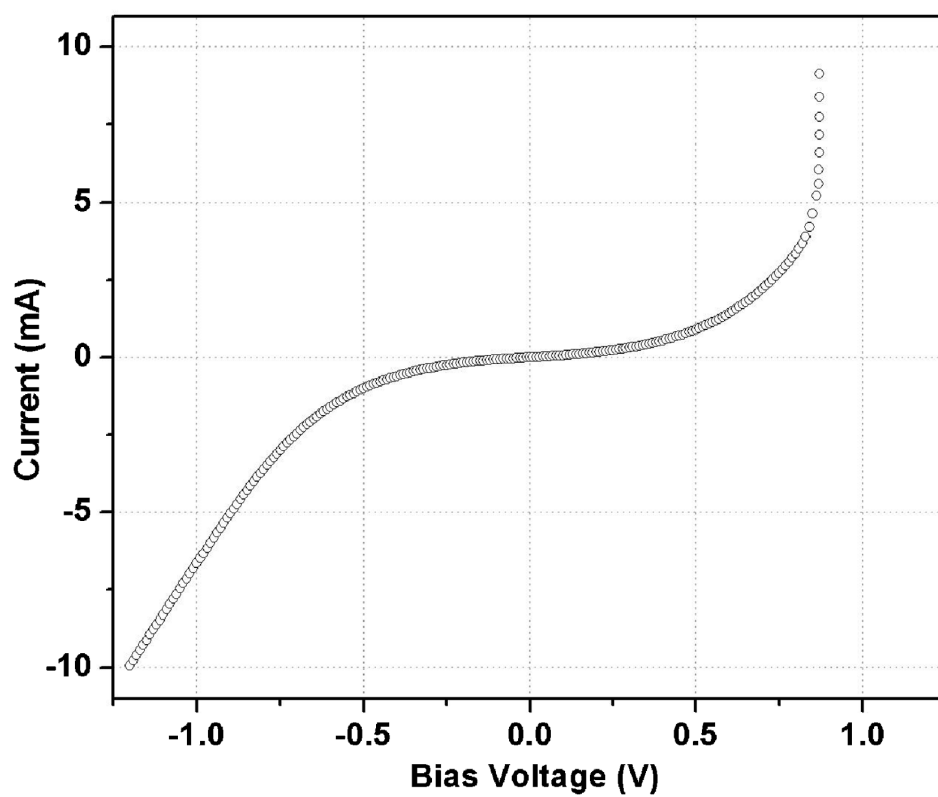

**Fig. S2.** *I-V* characteristics of Y-type film of two monolayers deposited at  $10 \text{ mN m}^{-1}$  leading to symmetrical *I-V* behaviour due to centrosymmetry.
